# Supplementary material for: (-)-Epigallocatechin-3-Gallate Attenuates the Adverse Reactions Triggered by Selenium Nanoparticles without Compromising Their Suppressing Effect on Peritoneal Carcinomatosis in Mice Bearing Hepatocarcinoma 22 Cells
Source: MDPI journal article supplement (doi:10.3390/molecules28093904), 2023-05-05
Supplement: s1 [file s1]

## Supplementary materials

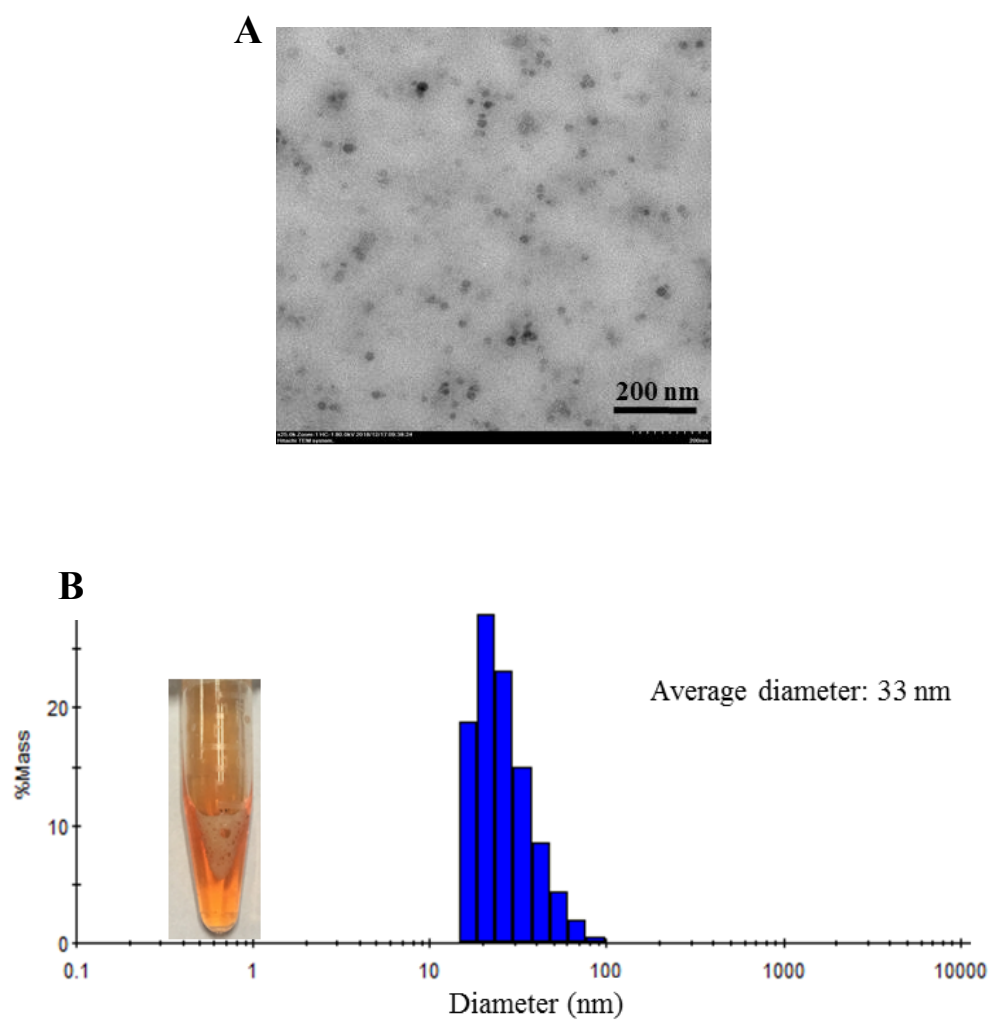

**Figure S1. Characterization of SeNPs. (A) TEM. (B) Size distribution.**

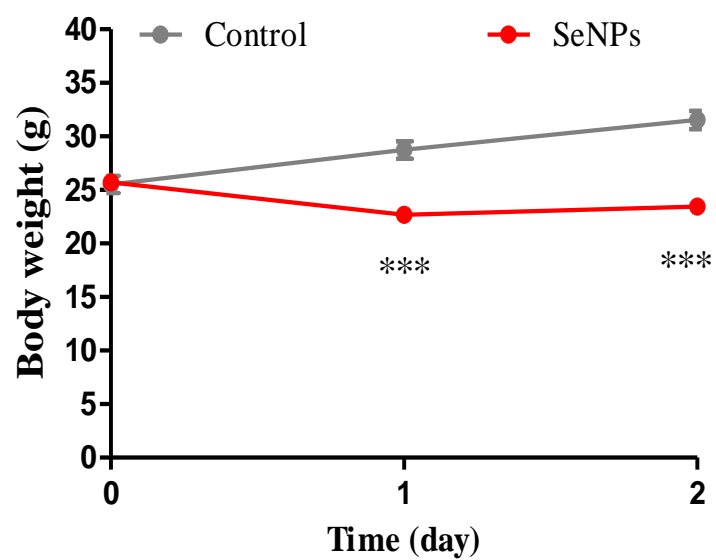

**Figure S2.** Body weight of mice post SeNPs treatment. **Experiment:** H22 model mice were i.p. injected with 3 mg/kg SeNPs, once.
